# Supplementary material
Source: PubMed Central journal article supplement (PMC1593174)

# Supplemental Figure S1

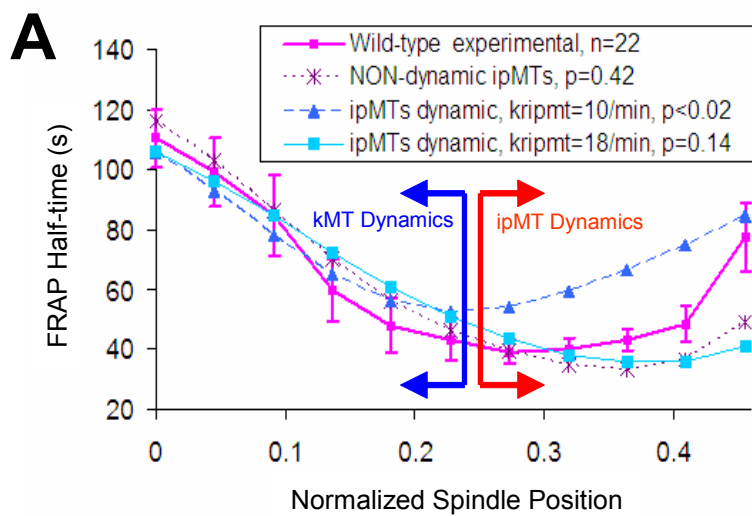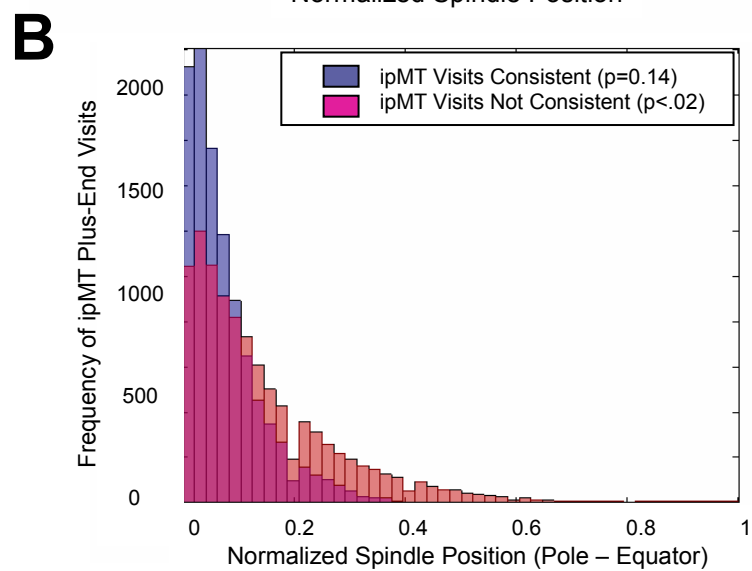

Supplement: mbc_E06-04-0312_1.pdf [file mbc_E06-04-0312_1.pdf]
